# Supplementary material
Source: publisher figshare collection journal article supplement (https://acs.figshare.com/ndownloader/files/4210249)
Supplement: Supplementary file 1 [file 4210249]

# **Water free neodymium 2,6-naphthalenedicarboxylates coordination complexes and their application as catalysts for isoprene polymerization.**

Inês Rodrigues, Ionut Mihalcea, Christophe Volkringer, Thierry Loiseau,<sup>\*</sup> Marc Visseaux

*Contribution from Unité de Catalyse et Chimie du Solide (UCCS) – UMR CNRS 8181, Université de Lille Nord de France, USTL-ENSCL, Bat C7, BP 90108, 59652 Villeneuve d'Ascq, France.*

<sup>\*</sup> To whom correspondence should be addressed. E-mail: [thierry.loiseau@ensc-lille.fr](mailto:thierry.loiseau@ensc-lille.fr)

## **SUPPLEMENTARY INFORMATION**

*To be submitted to Inorg. Chem.*  
Revised version november 22, 2011

Infrared analysis was carried out on a Perkin Elmer Spectrum 2 equipped with a single reflection diamond module (ATR). IR spectrum was recorded in the 400-4000  $\text{cm}^{-1}$  range, at 4  $\text{cm}^{-1}$  resolution.

## Compound 1

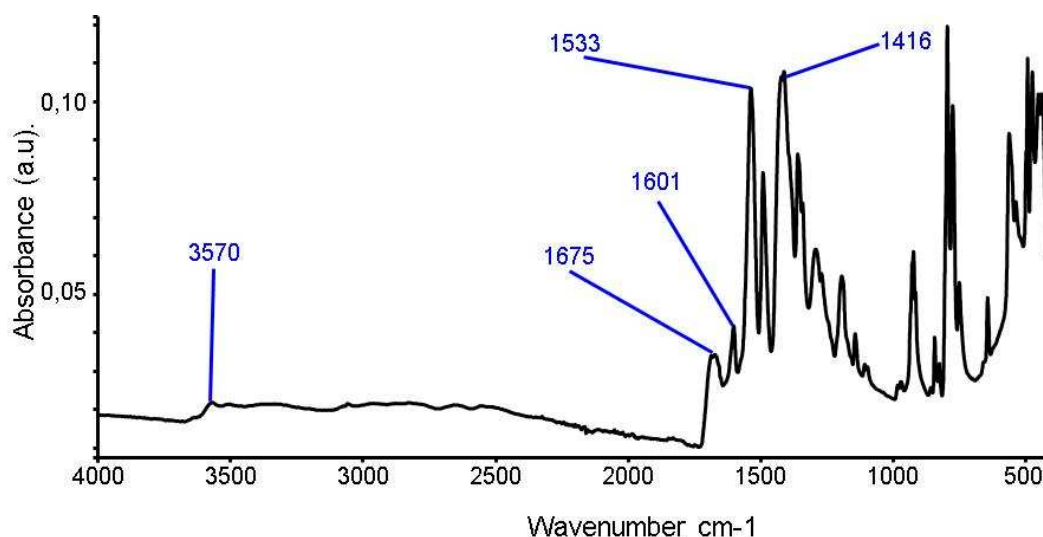

**Figure S1a:** Infrared spectrum of  $\text{Nd}_2(2,6\text{-ndc})_3(\text{H}_2\text{O})_3 \cdot \text{H}_2\text{O}$  (**1**)

Infrared spectrum of  $\text{Nd}_2(2,6\text{-ndc})_3(\text{H}_2\text{O})_3$  (**1**) shows a very broad band of absorption in the 3500 – 2500  $\text{cm}^{-1}$  range, indicating the presence of hydrogen bonds between the coordinating water and the free water molecules. For the coordinated species, the asymmetric stretching ( $\nu_{\text{O-H asym}}$ ) has been assigned at 3570  $\text{cm}^{-1}$ , the  $\nu_{\text{O-H sym}}$  occurs in the range of 3500 – 3000  $\text{cm}^{-1}$  as a low intensity broad band and the peak at 1601  $\text{cm}^{-1}$  has been assigned to the  $\delta_{\text{H-O-H}}$  bending. The  $\nu_{\text{COO asym}}$  stretching vibrations of carboxylate arms linked to Neodymium were observed at 1533  $\text{cm}^{-1}$ . The intense peak appearing at 1416  $\text{cm}^{-1}$  has been assigned to the C=C ring vibration of the 2,6-ndc ligand. The peak localized at 1675  $\text{cm}^{-1}$  should correspond to DMF ( $\nu_{\text{C=O}}$ ) remaining after the washing procedure.

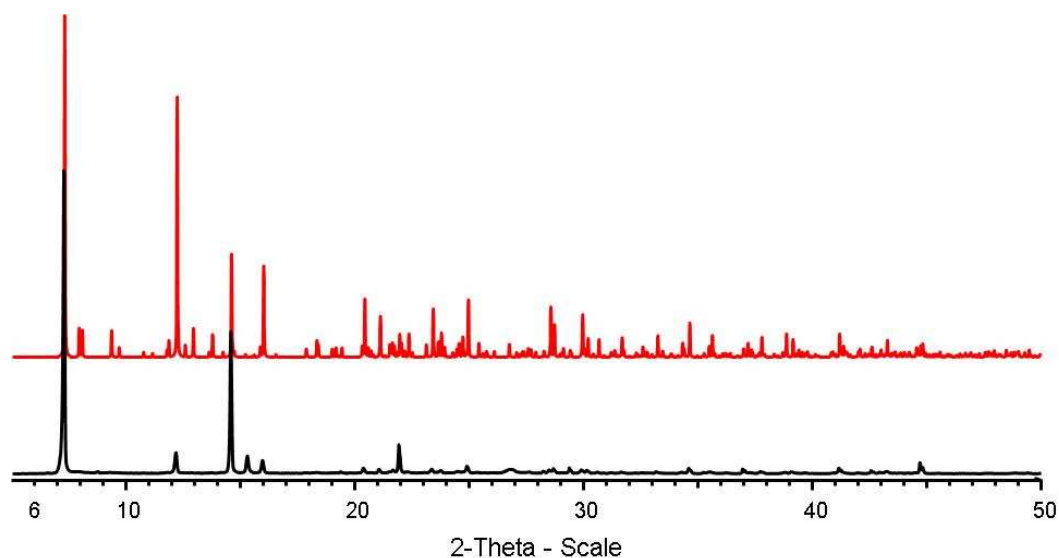

**Figure S1b:** Calculated (top) and experimental (bottom) X-ray diffraction powder patterns of  $\text{Nd}_2(2,6\text{-ndc})_3(\text{H}_2\text{O})_3 \cdot \text{H}_2\text{O}$  (**1**; copper radiation).

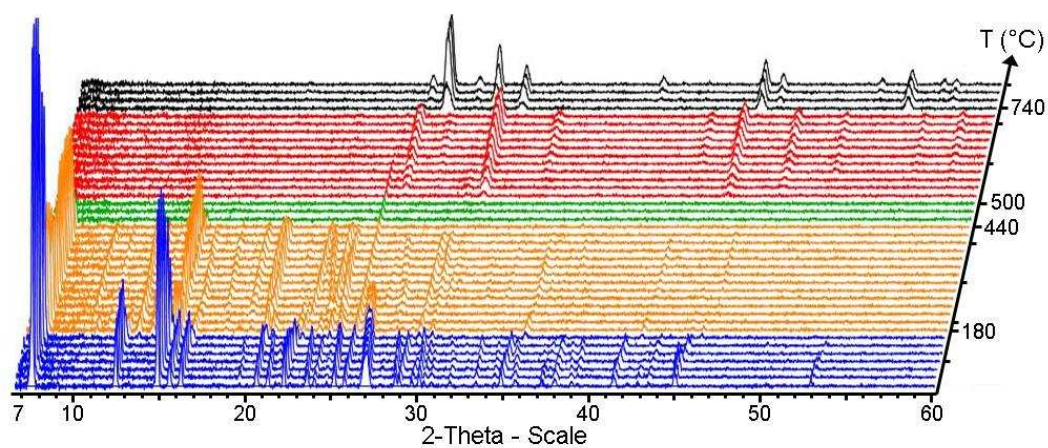

**Figure S1c:** X-ray thermodiffraction patterns of  $\text{Nd}_2(2,6\text{-ndc})_3(\text{H}_2\text{O})_3 \cdot \text{H}_2\text{O}$  (**1**) under air atmosphere (copper radiation).

## Compound **3**

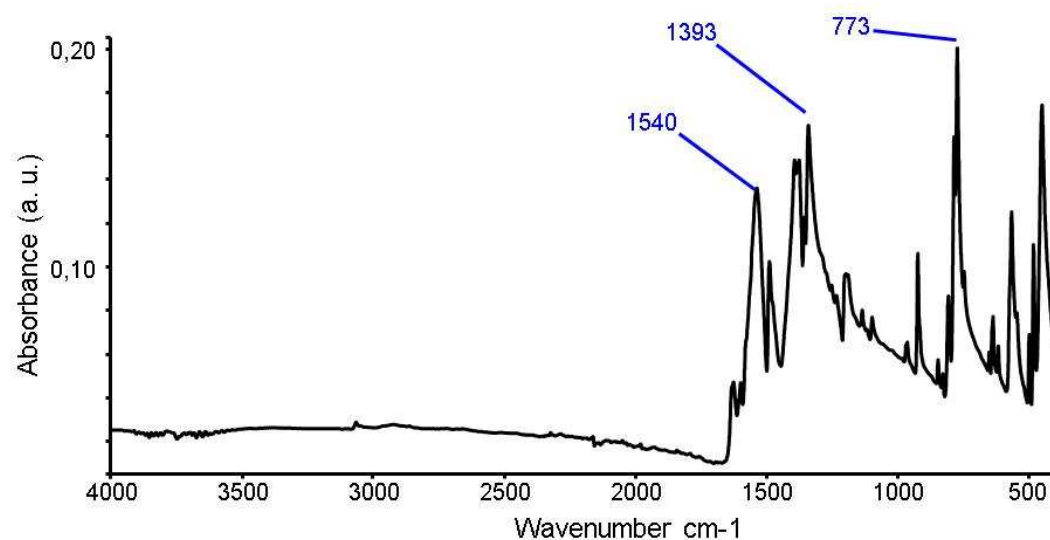

**Figure S2a:** Infrared spectrum of Nd(2,6-ndc)(form) (**3**)

Infrared spectrum of Nd(2,6-ndc)(form) (**3**) confirm the presence of coordinating carboxylate functions ( $\nu_{\text{COO asym}}$  at  $1540\text{ cm}^{-1}$ ). The Nd-O related vibrations give absorbance in the domain  $800\text{--}400\text{ cm}^{-1}$ . In our case only the peak appearing at  $773\text{ cm}^{-1}$  can be assigned to Nd-O asymmetric stretching vibration ( $\nu_{\text{Nd-O asym}}$ ). The intense peak at  $1393\text{ cm}^{-1}$  can be attributed to the C=C ring vibration.

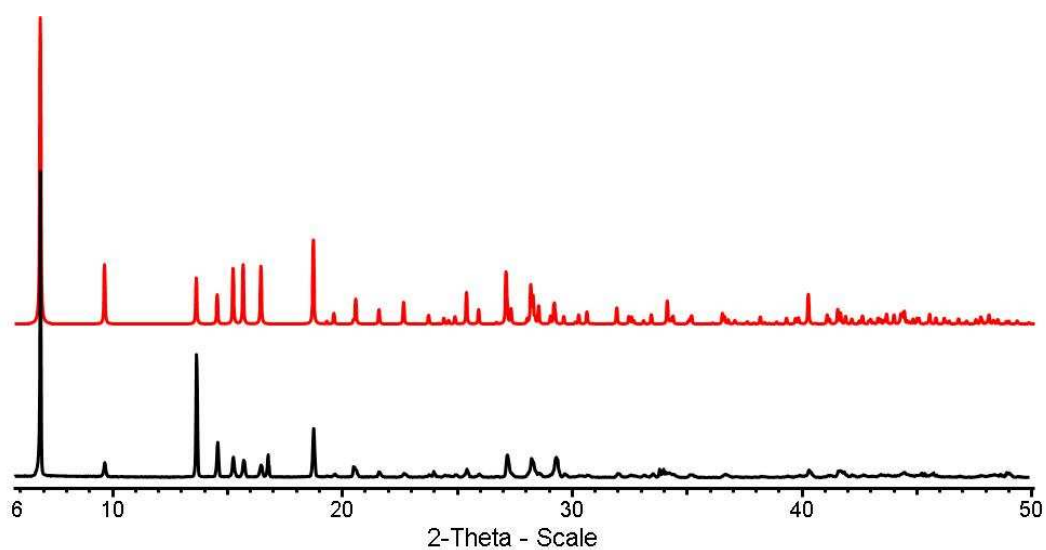

**Figure S2b:** Calculated (top) and experimental (bottom) X-ray diffraction powder patterns of Nd(2,6-ndc)(form) (**3**; copper radiation).

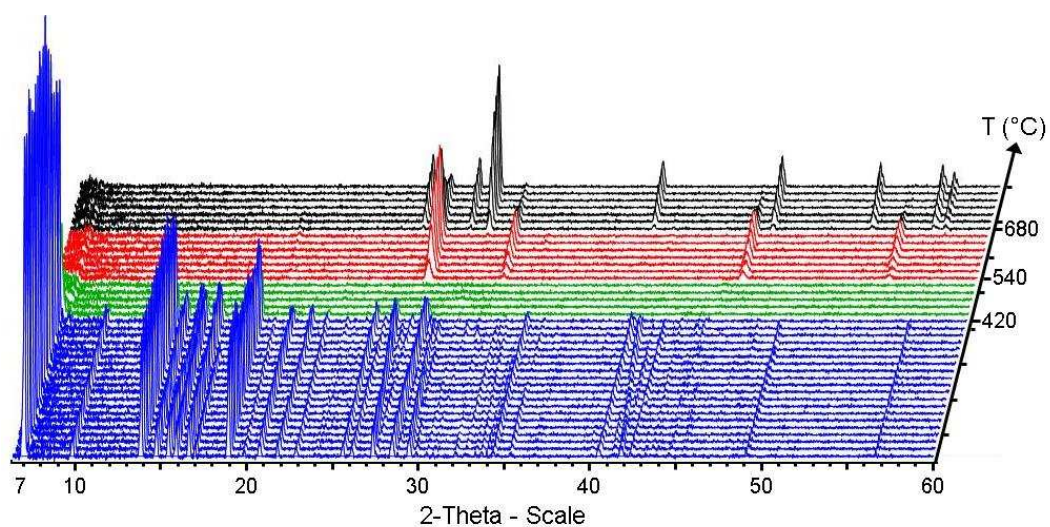

**Figure S2c:** X-ray thermodiffraction patterns of Nd(2,6-ndc)(form) (**3**) under air atmosphere (copper radiation).

## Compound 4

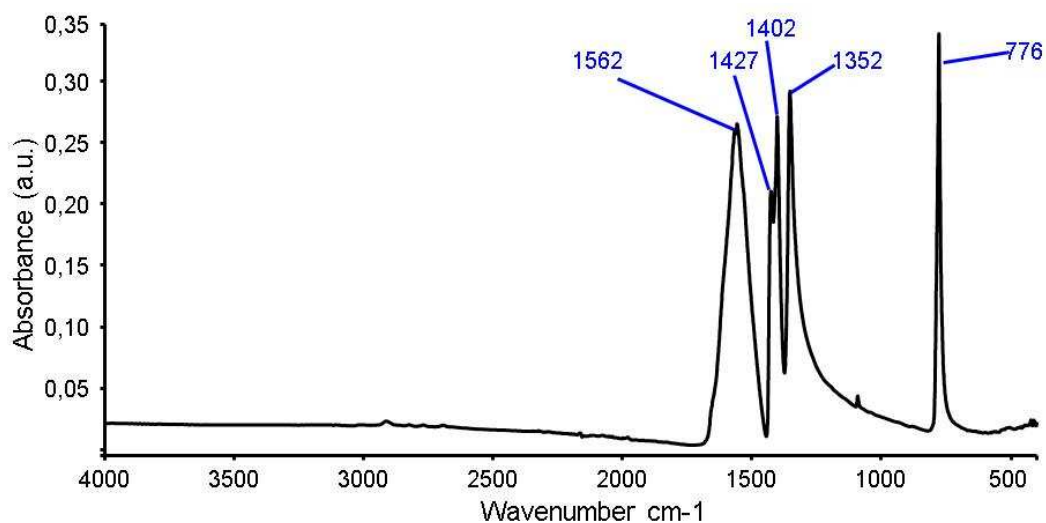

**Figure S3a:** Infrared spectrum of Nd(form)<sub>3</sub> (**4**)

Infrared spectrum of Nd(form)<sub>3</sub> (**4**) shows a broad band centered at 1562 cm<sup>-1</sup> and a sharper one at 1427 assigned respectively to the asymmetric ( $\nu_{\text{COO as}}$ ) and symmetric ( $\nu_{\text{COO sy}}$ ) stretching of the carboxylate function linked to Nd<sup>3+</sup>. The vibrational modes of C-H are localized at 1402 and 1352 cm<sup>-1</sup>. The intense peak observed at 776 cm<sup>-1</sup> corresponds to Nd-O asymmetric stretching vibration ( $\nu_{\text{Nd-O asym}}$ ).

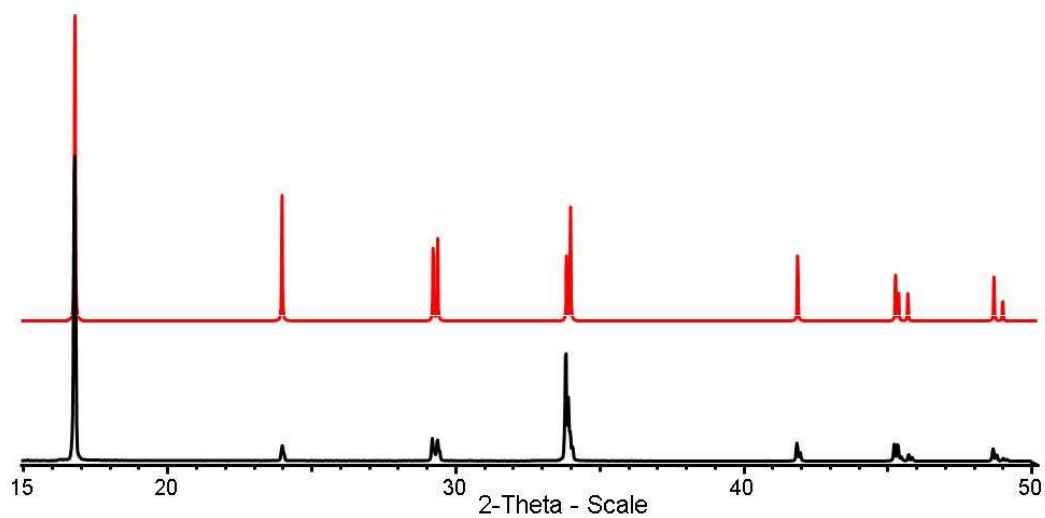

**Figure S3b:** Calculated (top) and experimental (bottom) X-ray diffraction powder patterns of  $\text{Nd}(\text{form})_3$  (**4**; copper radiation).

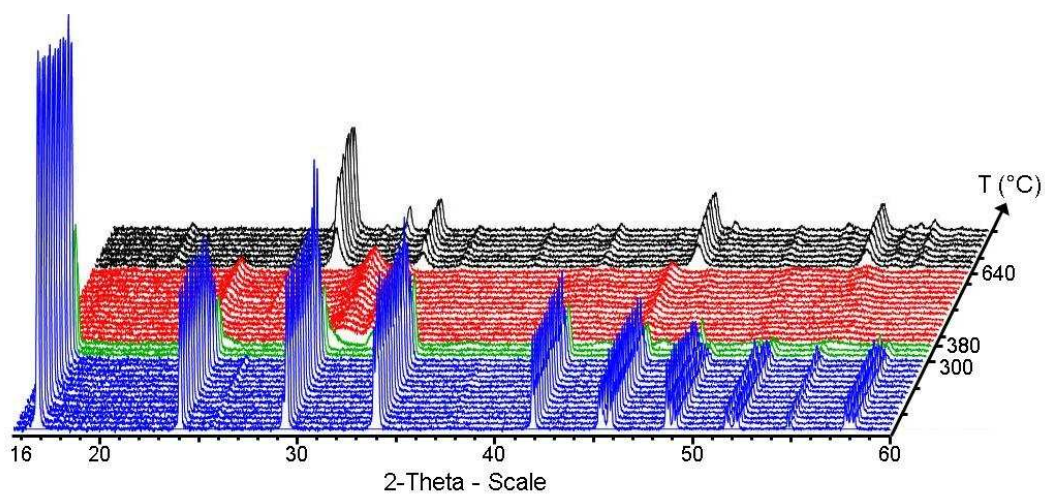

**Figure S3c:** X-ray thermodiffraction patterns of  $\text{Nd}(\text{form})_3$  (**4**) under air atmosphere (copper radiation).
